# Supplementary material
Source: Springer Nature journal article supplement (https://www.springermedizin.de/resource/supplementary/13054_2012_898_MOESM2_ESM.pdf/9709288)

|                                     | Study or Subgroup <sup>^</sup>                                                                           | Omega-3 |            | Control |            | Weight        | Risk Ratio               |
|-------------------------------------|----------------------------------------------------------------------------------------------------------|---------|------------|---------|------------|---------------|--------------------------|
|                                     |                                                                                                          | Events  | Total      | Events  | Total      |               | M-H, Random, 95% CI      |
| <input checked="" type="checkbox"/> | <b>1.2.1 ICU patients</b>                                                                                |         |            |         |            |               |                          |
| <input checked="" type="checkbox"/> | Friesecke 2008                                                                                           | 11      | 83         | 12      | 82         | 17.1%         | 0.91 [0.42, 1.93]        |
| <input checked="" type="checkbox"/> | Wachtler 1997                                                                                            | 2       | 19         | 6       | 21         | 4.5%          | 0.37 [0.08, 1.61]        |
| <input checked="" type="checkbox"/> | Wang 2008                                                                                                | 3       | 20         | 5       | 20         | 5.9%          | 0.60 [0.17, 2.18]        |
| <input checked="" type="checkbox"/> | Weiss 2002                                                                                               | 5       | 12         | 5       | 11         | 11.4%         | 0.92 [0.36, 2.33]        |
| <input checked="" type="checkbox"/> | Wichmann 2007                                                                                            | 5       | 127        | 10      | 129        | 9.0%          | 0.51 [0.18, 1.44]        |
|                                     | <b>Subtotal (95% CI)</b>                                                                                 |         | <b>261</b> |         | <b>263</b> | <b>47.9%</b>  | <b>0.71 [0.45, 1.12]</b> |
|                                     | Total events                                                                                             | 26      |            | 38      |            |               |                          |
|                                     | Heterogeneity: Tau <sup>2</sup> = 0.00; Chi <sup>2</sup> = 1.94, df = 4 (P = 0.75); I <sup>2</sup> = 0%  |         |            |         |            |               |                          |
|                                     | Test for overall effect: Z = 1.47 (P = 0.14)                                                             |         |            |         |            |               |                          |
| <input checked="" type="checkbox"/> | <b>1.2.2 Not ICU patients</b>                                                                            |         |            |         |            |               |                          |
| <input checked="" type="checkbox"/> | Badia-Tahull 2010                                                                                        | 3       | 13         | 11      | 14         | 9.3%          | 0.29 [0.10, 0.82]        |
| <input checked="" type="checkbox"/> | Jiang 2010                                                                                               | 4       | 100        | 12      | 103        | 8.2%          | 0.34 [0.11, 1.03]        |
| <input checked="" type="checkbox"/> | Klek 2005                                                                                                | 9       | 29         | 14      | 29         | 22.6%         | 0.64 [0.33, 1.24]        |
| <input checked="" type="checkbox"/> | Liang 2008                                                                                               | 1       | 20         | 1       | 21         | 1.3%          | 1.05 [0.07, 15.68]       |
| <input checked="" type="checkbox"/> | Makay 2011                                                                                               | 2       | 14         | 1       | 12         | 1.9%          | 1.71 [0.18, 16.65]       |
| <input checked="" type="checkbox"/> | Senkal 2007                                                                                              | 4       | 19         | 7       | 21         | 8.8%          | 0.63 [0.22, 1.82]        |
|                                     | <b>Subtotal (95% CI)</b>                                                                                 |         | <b>195</b> |         | <b>200</b> | <b>52.1%</b>  | <b>0.53 [0.34, 0.82]</b> |
|                                     | Total events                                                                                             | 23      |            | 46      |            |               |                          |
|                                     | Heterogeneity: Tau <sup>2</sup> = 0.00; Chi <sup>2</sup> = 3.58, df = 5 (P = 0.61); I <sup>2</sup> = 0%  |         |            |         |            |               |                          |
|                                     | Test for overall effect: Z = 2.86 (P = 0.004)                                                            |         |            |         |            |               |                          |
|                                     | <b>Total (95% CI)</b>                                                                                    |         | <b>456</b> |         | <b>463</b> | <b>100.0%</b> | <b>0.61 [0.45, 0.84]</b> |
|                                     | Total events                                                                                             | 49      |            | 84      |            |               |                          |
|                                     | Heterogeneity: Tau <sup>2</sup> = 0.00; Chi <sup>2</sup> = 6.35, df = 10 (P = 0.79); I <sup>2</sup> = 0% |         |            |         |            |               |                          |
|                                     | Test for overall effect: Z = 3.08 (P = 0.002)                                                            |         |            |         |            |               |                          |
|                                     | Test for subgroup differences: Chi <sup>2</sup> = 0.84, df = 1 (P = 0.36), I <sup>2</sup> = 0%           |         |            |         |            |               |                          |

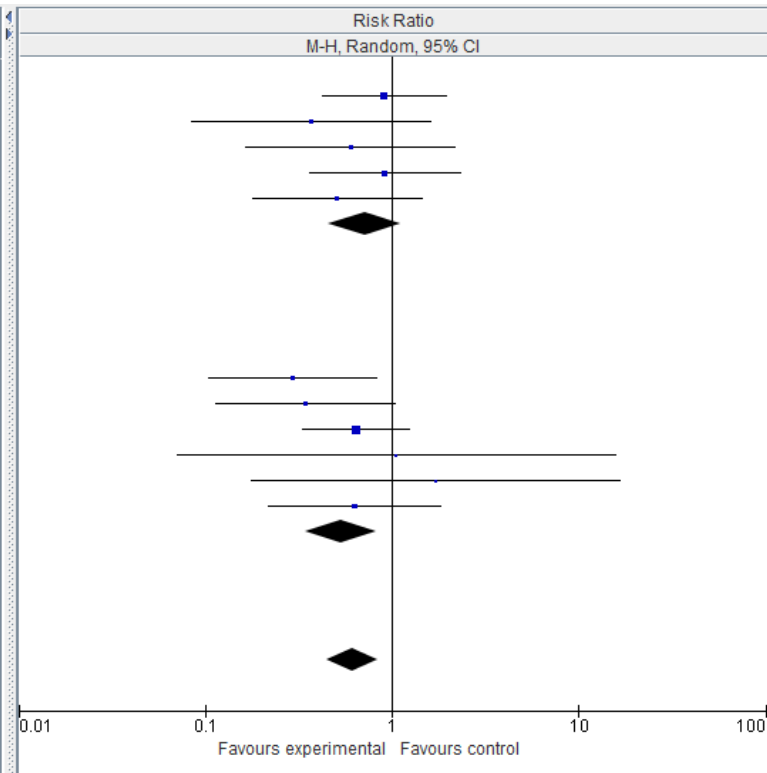

Supplement: MOESM2 [file 9709288]
